# Supplementary material
Source: Springer Nature journal article supplement (https://www.springermedizin.de/resource/supplementary/13058_2010_2616_MOESM7_ESM.pdf/9702152)

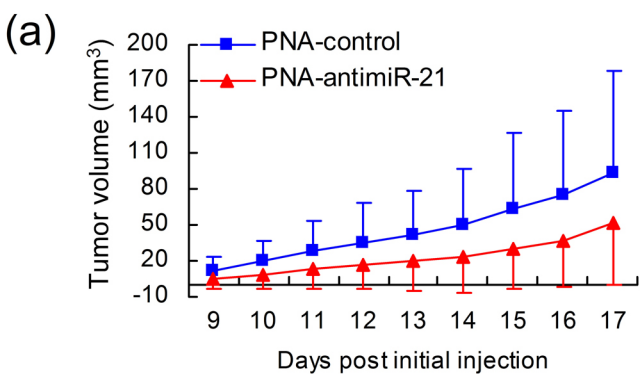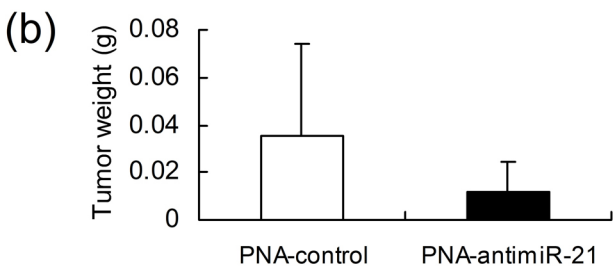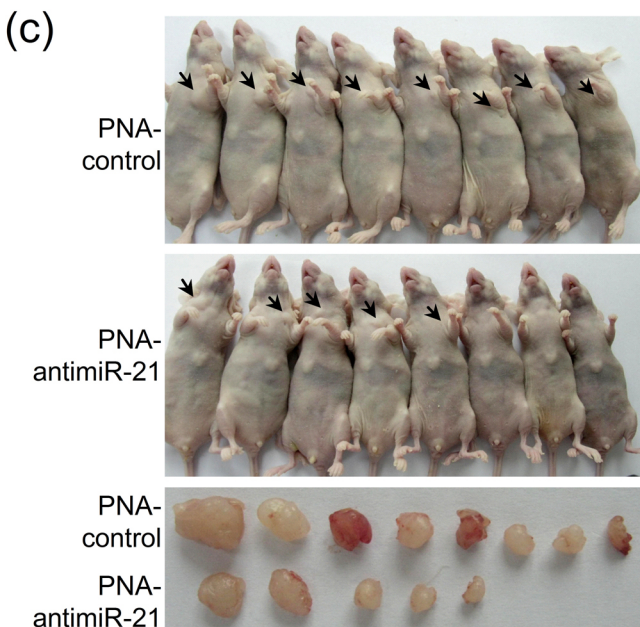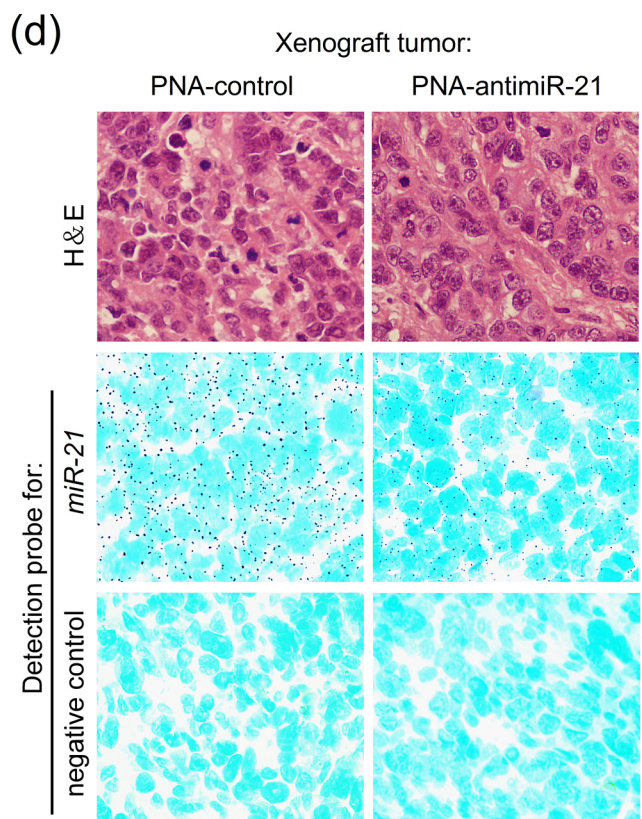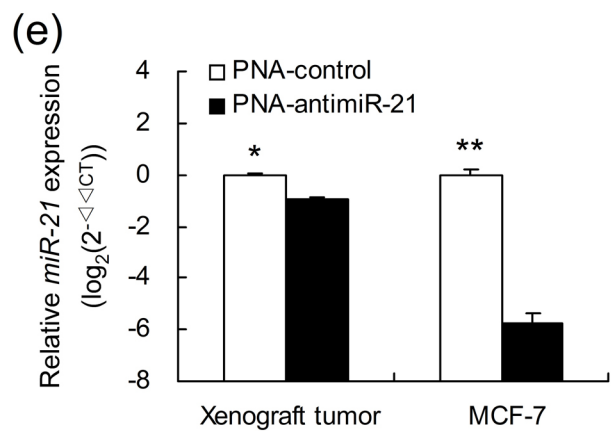

Supplement: MOESM7 [file 9702152]
